# Supplementary material for: Fake anabolic androgenic steroids on the black market – a systematic review and meta-analysis on qualitative and quantitative analytical results found within the literature
Source: PubMed Central journal article supplement (PMC9288681; doi:10.1186/s12889-022-13734-4), 2022-07-17
Supplement: 12889_2022_13734_MOESM4_ESM.pdf [file 12889_2022_13734_MOESM4_ESM.pdf]

# Fake Anabolic Androgenic Steroids on the Black Market – a systematic review and meta-analysis

## MAIN OUTCOME 1:

### Proportions of counterfeit AAS-samples

Proportions of counterfeit anabolic androgenic steroids from 18 studies, grouped by geographical region

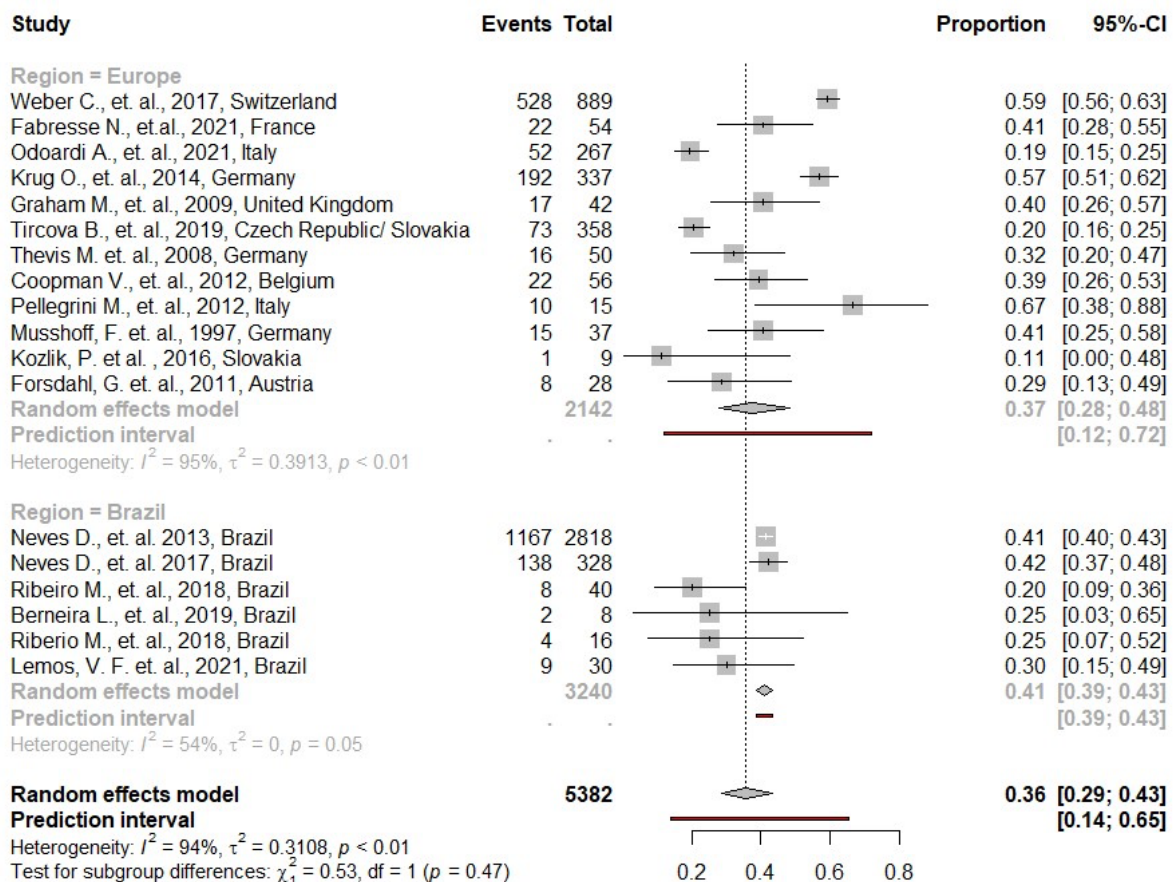

Number of studies combined:  $k = 18$

Number of observations:  $o = 5382$

Number of events:  $e = 2284$

|                      | proportion | 95%-CI           |
|----------------------|------------|------------------|
| Random effects model | 0.3573     | [0.2869; 0.4346] |
| Prediction interval  |            | [0.1403; 0.6545] |

### Quantifying heterogeneity:

$\tau^2 = 0.3108$ ;  $\tau = 0.5575$ ;  $I^2 = 93.7\%$  [91.4%; 95.4%];  $H = 3.98$  [3.41; 4.65]

### Test of heterogeneity:

|        |             |                  |
|--------|-------------|------------------|
| Q d.f. | p-value     | Test             |
| 269.34 | 17 < 0.0001 | Wald-type        |
| 301.17 | 17 < 0.0001 | Likelihood-Ratio |

### Results for subgroups (random effects model):

|                 | k  | proportion | 95%-CI tau <sup>2</sup> | tau    | Q      | I <sup>2</sup> |
|-----------------|----|------------|-------------------------|--------|--------|----------------|
| Region = Europe | 12 | 0.3742     | [0.2770; 0.4828]        | 0.3913 | 0.6256 | 244.19 95.5%   |
| Region = Brazil | 6  | 0.4099     | [0.3879; 0.4323]        | 0      | 0      | 10.94 54.3%    |

### Test for subgroup differences (random effects model):

|                |               |
|----------------|---------------|
| Q d.f.         | p-value       |
| Between groups | 0.53 1 0.4662 |

### Prediction intervals for subgroups:

|                                  |
|----------------------------------|
| 95%-PI                           |
| Region = Europe [0.1214; 0.7213] |
| Region = Brazil [0.3861; 0.4341] |

Details on meta-analytical method:

- Random intercept logistic regression model
- Maximum-likelihood estimator for tau<sup>2</sup>
- Hartung-Knapp adjustment for random effects model
- Logit transformation
- Clopper-Pearson confidence interval for individual studies

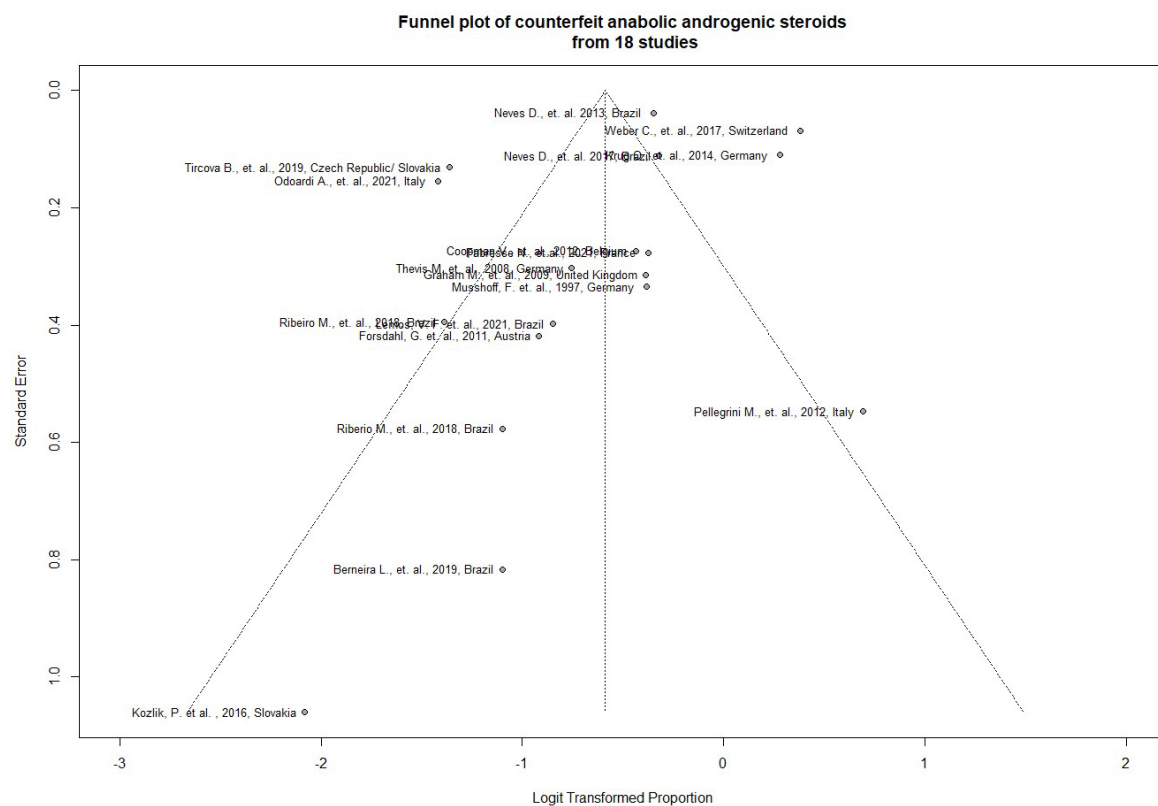

Review: Counterfeit

### Linear regression test of funnel plot asymmetry

Test result: t = -0.80, df = 16, p-value = 0.4365

**Sample estimates:**

bias se.bias intercept se.intercept  
-10.3550 12.9735 -0.2476 0.1206

**Details:**

- multiplicative residual heterogeneity variance ( $\tau^2 = 16.1889$ )
- predictor: inverse of total sample size
- weight: inverse variance of average event probability
- reference: Peters et al. (2006), JAMA

**Meta-regression by publication year**

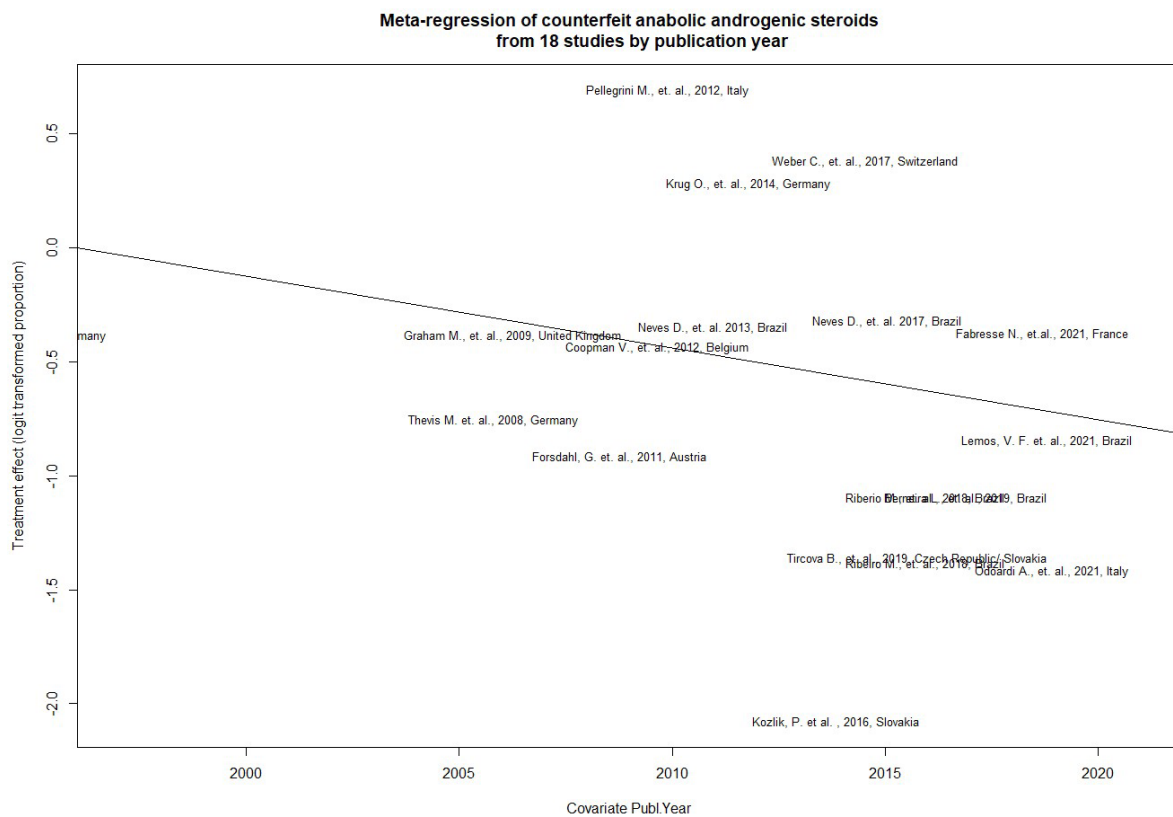

**Mixed-Effects Model (k = 18;  $\tau^2$  estimator: ML)**

$\tau^2$  (estimated amount of residual heterogeneity): 0.2842  
 $\tau$  (square root of estimated  $\tau^2$  value): 0.5331  
 $I^2$  (residual heterogeneity / unaccounted variability): 92.2615%  
 $H^2$  (unaccounted variability / sampling variability): 12.9224

**Tests for Residual Heterogeneity:**

Wld(df = 16) = 265.3596, p-val < .0001  
LRT(df = 16) = 289.6485, p-val < .0001

**Test of Moderators (coefficient 2):**

F(df1 = 1, df2 = 16) = 1.5458, p-val = 0.2317

**Model Results:**

|           | estimate | se      | tval    | df | pval   | ci.lb    | ci.ub    |
|-----------|----------|---------|---------|----|--------|----------|----------|
| intrcpt   | 62.8358  | 51.0089 | 1.2319  | 16 | 0.2358 | -45.2983 | 170.9699 |
| Publ.Year | -0.0315  | 0.0253  | -1.2433 | 16 | 0.2317 | -0.0852  | 0.0222   |

---

Signif. codes: 0 '\*\*\*' 0.001 '\*\*' 0.01 '\*' 0.05 '.' 0.1 ' ' 1

## MAIN OUTCOME 2: Proportions of substandard AAS-samples

Proportions of substandard anabolic androgenic steroids from 8 studies,  
grouped by geographical region

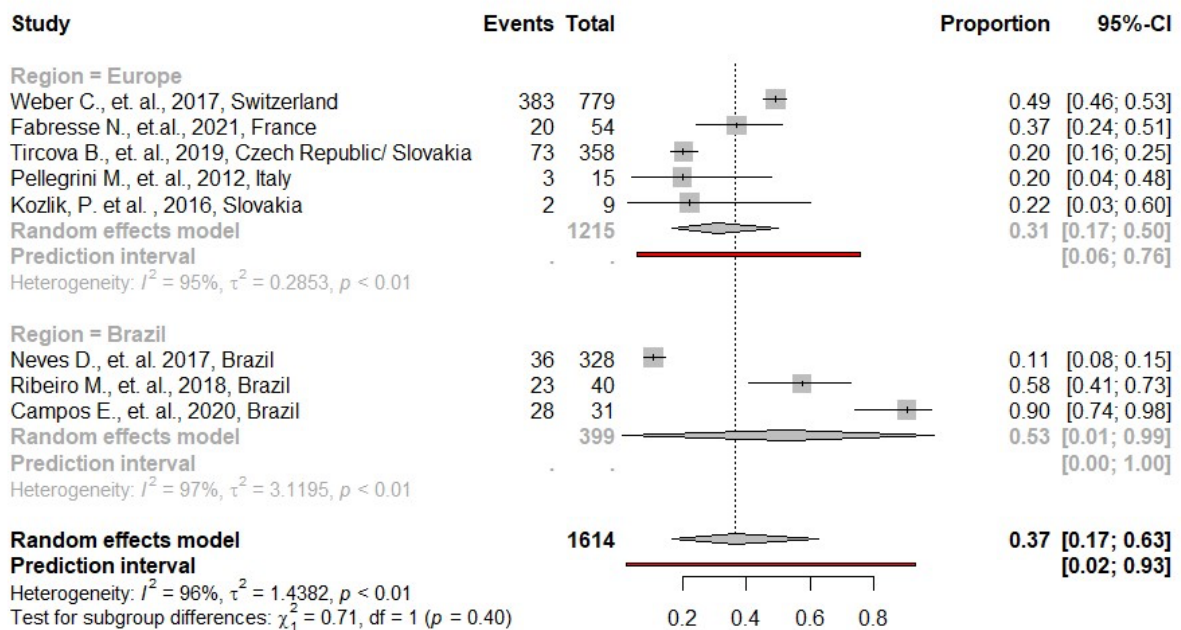

Number of studies combined:  $k = 8$

Number of observations:  $o = 1614$

Number of events:  $e = 568$

|                      | proportion | 95%-CI           |
|----------------------|------------|------------------|
| Random effects model | 0.3683     | [0.1681; 0.6273] |
| Prediction interval  |            | [0.0248; 0.9304] |

Quantifying heterogeneity:

$\tau^2 = 1.4382$ ;  $\tau = 1.1993$ ;  $I^2 = 96.4\%$  [94.7%; 97.6%];  $H = 5.29$  [4.33; 6.48]

Test of heterogeneity:

| Q      | d.f. | p-value  | Test             |
|--------|------|----------|------------------|
| 196.24 | 7    | < 0.0001 | Wald-type        |
| 254.95 | 7    | < 0.0001 | Likelihood-Ratio |

Results for subgroups (random effects model):

|                 | k | proportion | 95%-CI           | $\tau^2$ | $\tau$ | Q     | $I^2$ |
|-----------------|---|------------|------------------|----------|--------|-------|-------|
| Region = Europe | 5 | 0.3096     | [0.1664; 0.5017] | 0.2853   | 0.5341 | 83.25 | 95.2% |

Region = Brazil 3 0.5289 [0.0123; 0.9902] 3.1195 1.7662 79.09 97.5%

**Test for subgroup differences (random effects model):**

Q d.f. p-value

Between groups 0.71 1 0.3981

**Prediction intervals for subgroups:**

95%-PI

Region = Europe [0.0607; 0.7566]

Region = Brazil [0.0000; 1.0000]

**Details on meta-analytical method:**

- Random intercept logistic regression model
- Maximum-likelihood estimator for  $\tau^2$
- Hartung-Knapp adjustment for random effects model
- Logit transformation
- Clopper-Pearson confidence interval for individual studies

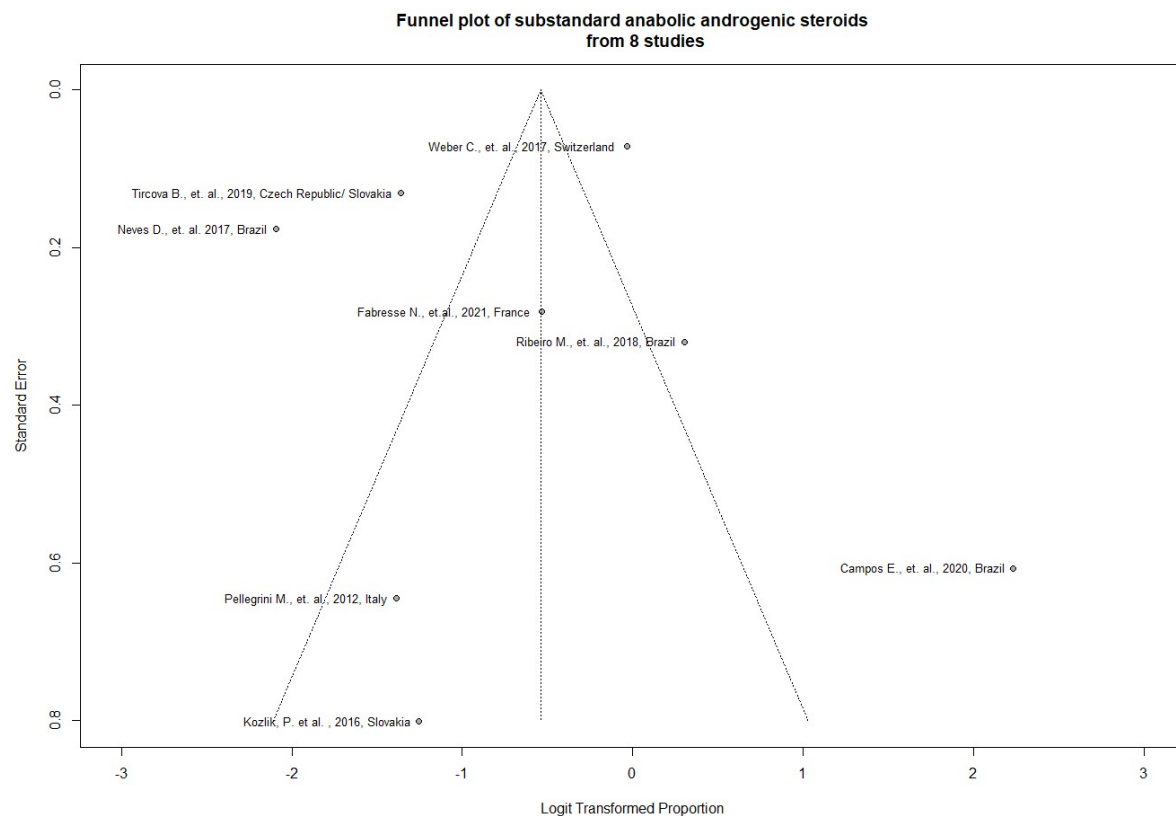

**Review: Substandard**

**Linear regression test of funnel plot asymmetry**

Test result:  $t = -0.03$ ,  $df = 6$ ,  $p\text{-value} = 0.9803$

**Sample estimates:**

bias se.bias intercept se.intercept  
-0.7573 29.3840 -0.4926 0.3486

Details:

- multiplicative residual heterogeneity variance ( $\tau^2 = 32.7035$ )
- predictor: inverse of total sample size
- weight: inverse variance of average event probability
- reference: Peters et al. (2006), JAMA

### Meta-regression by publication year

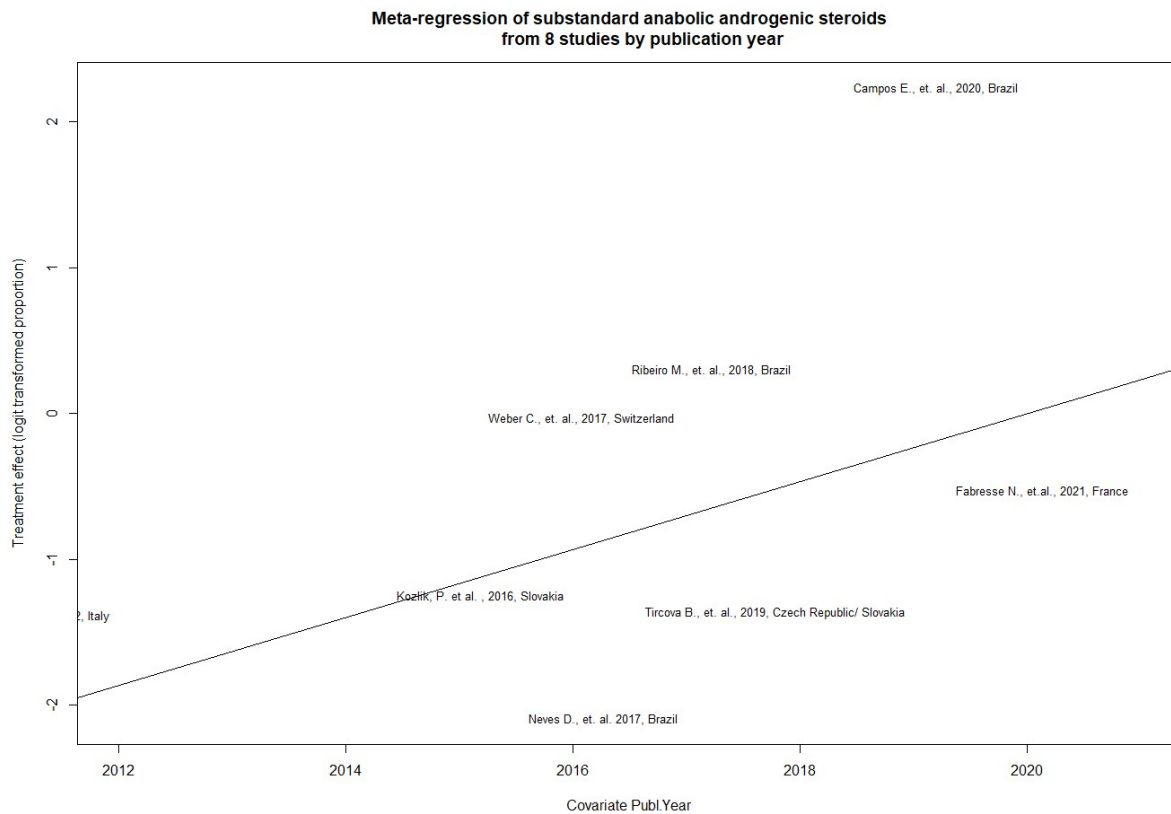

### Mixed-Effects Model (k = 8; $\tau^2$ estimator: ML)

$\tau^2$  (estimated amount of residual heterogeneity): 1.1616  
 $\tau$  (square root of estimated  $\tau^2$  value): 1.0778  
 $I^2$  (residual heterogeneity / unaccounted variability): 96.1925%  
 $H^2$  (unaccounted variability / sampling variability): 26.2642

### Tests for Residual Heterogeneity:

Wld(df = 6) = 187.8444, p-val < .0001  
LRT(df = 6) = 253.3894, p-val < .0001

### Test of Moderators (coefficient 2):

F(df1 = 1, df2 = 6) = 1.9481, p-val = 0.2123

### Model Results:

| estimate | se | tval | df | pval | ci.lb | ci.ub |
|----------|----|------|----|------|-------|-------|
|----------|----|------|----|------|-------|-------|

intrcpt -469.6791 336.1271 -1.3973 6 0.2118 -1292.1525 352.7943  
Publ.Year 0.2325 0.1666 1.3957 6 0.2123 -0.1751 0.6401

---

Signif. codes: 0 '\*\*\*' 0.001 '\*\*' 0.01 '\*' 0.05 '.' 0.1 ' ' 1
