# Supplementary material for: Fake anabolic androgenic steroids on the black market – a systematic review and meta-analysis on qualitative and quantitative analytical results found within the literature
Source: BMC Public Health. 2022 Jul 17;22:1371. doi: 10.1186/s12889-022-13734-4 (PMC9288681; doi:10.1186/s12889-022-13734-4)
Supplement: Supplementary file 5 — Additional file 5. Supplementary analyses. [file 12889_2022_13734_MOESM5_ESM.pdf]

# Fake Anabolic Androgenic Steroids on the Black Market – a systematic review and meta-analysis

## SUPPLEMENTAL MATERIAL

### S 1.1. PROPORTION OF INERT AAS-SAMPLES

#### SUMMARY

**INERT AAS-SAMPLES (No active ingredients):**

**24% (CI-95: 0.09 TO 0.49) OVERALL; WITH HIGH HETEROGENEITY (96%); SIGNIFICANTLY LOWER ( $p < 0.05$ ) IN EUROPE (15%) THAN IN BRAZIL (49%).**

**Meta-Regression by publication year showed a significant increase of inert AAS-samples over time ( $p < 0.05$ ).**

Review: Inert

Proportions of inert AAS-sampels from 11 studies

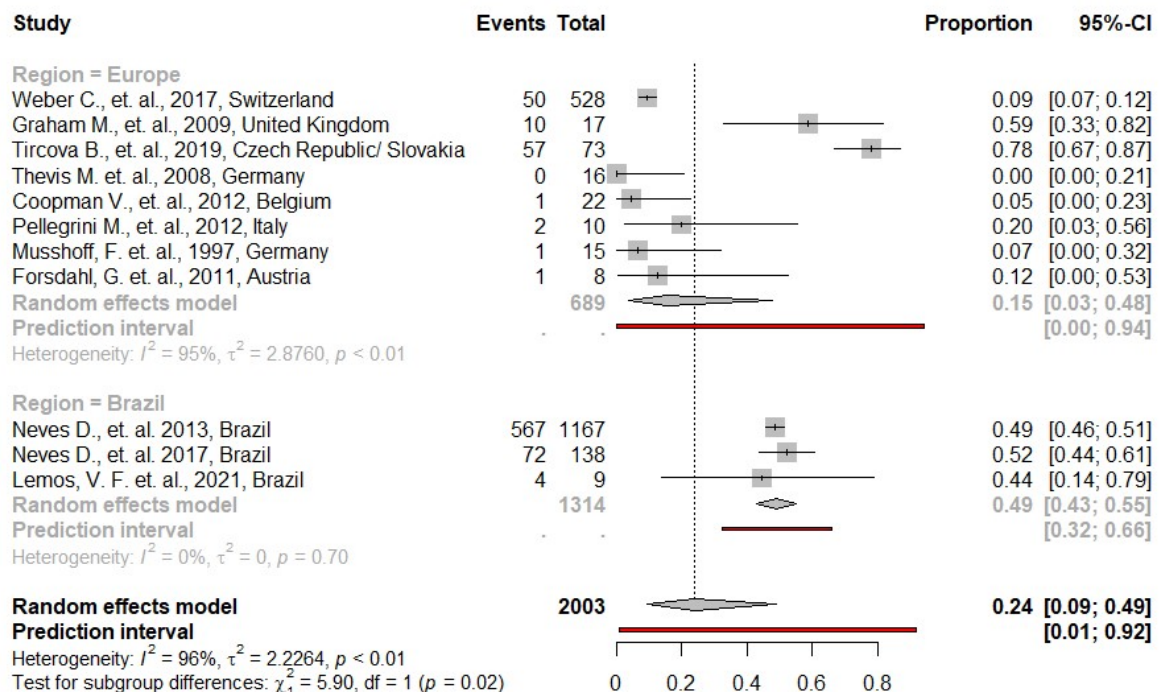

Number of studies combined:  $k = 11$

Number of observations:  $o = 2003$

Number of events:  $e = 765$

|                      | proportion | 95%-CI           |
|----------------------|------------|------------------|
| Random effects model | 0.2385     | [0.0927; 0.4899] |
| Prediction interval  |            | [0.0088; 0.9169] |

### Quantifying heterogeneity:

$\tau^2 = 2.2264$ ;  $\tau = 1.4921$ ;  $I^2 = 95.9\%$  [94.2%; 97.1%];  $H = 4.95$  [4.15; 5.90]

### Test of heterogeneity:

| Q      | d.f. | p-value  | Test             |
|--------|------|----------|------------------|
| 244.79 | 10   | < 0.0001 | Wald-type        |
| 381.56 | 10   | < 0.0001 | Likelihood-Ratio |

### Results for subgroups (random effects model):

|                 | k | proportion | 95%-CI           | $\tau^2$ | $\tau$ | Q      | $I^2$ |
|-----------------|---|------------|------------------|----------|--------|--------|-------|
| Region = Europe | 8 | 0.1535     | [0.0348; 0.4769] | 2.8760   | 1.6959 | 139.34 | 95.0% |
| Region = Brazil | 3 | 0.4893     | [0.4304; 0.5486] | 0        | 0      | 0.71   | 0.0%  |

### Test for subgroup differences (random effects model):

|                | Q    | d.f. | p-value |
|----------------|------|------|---------|
| Between groups | 5.90 | 1    | 0.0151  |

### Prediction intervals for subgroups:

|                 | 95%-PI           |
|-----------------|------------------|
| Region = Europe | [0.0021; 0.9408] |
| Region = Brazil | [0.3222; 0.6589] |

### Details on meta-analytical method:

- Random intercept logistic regression model
- Maximum-likelihood estimator for  $\tau^2$
- Hartung-Knapp adjustment for random effects model
- Logit transformation
- Clopper-Pearson confidence interval for individual studies
- Continuity correction of 0.5 in studies with zero cell frequencies  
(only used to calculate individual study results)

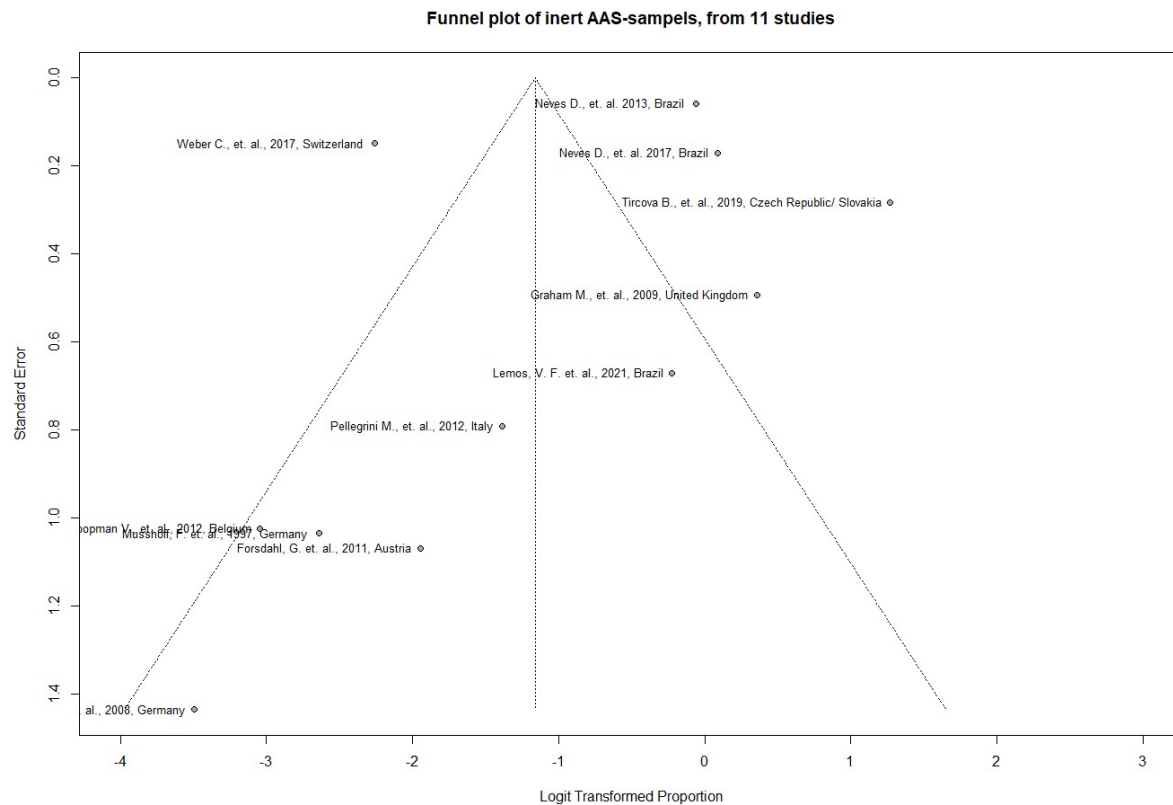

### Linear regression test of funnel plot asymmetry

**Test result:**  $t = -0.15$ ,  $df = 9$ ,  $p\text{-value} = 0.8858$

Sample estimates:

|  | bias    | se.bias | intercept | se.intercept |
|--|---------|---------|-----------|--------------|
|  | -2.9725 | 20.1245 | -0.2619   | 0.2902       |

Details:

- multiplicative residual heterogeneity variance ( $\tau^2 = 30.5153$ )
- predictor: inverse of total sample size
- weight: inverse variance of average event probability
- reference: Peters et al. (2006), JAMA

## Meta-regression by publication year

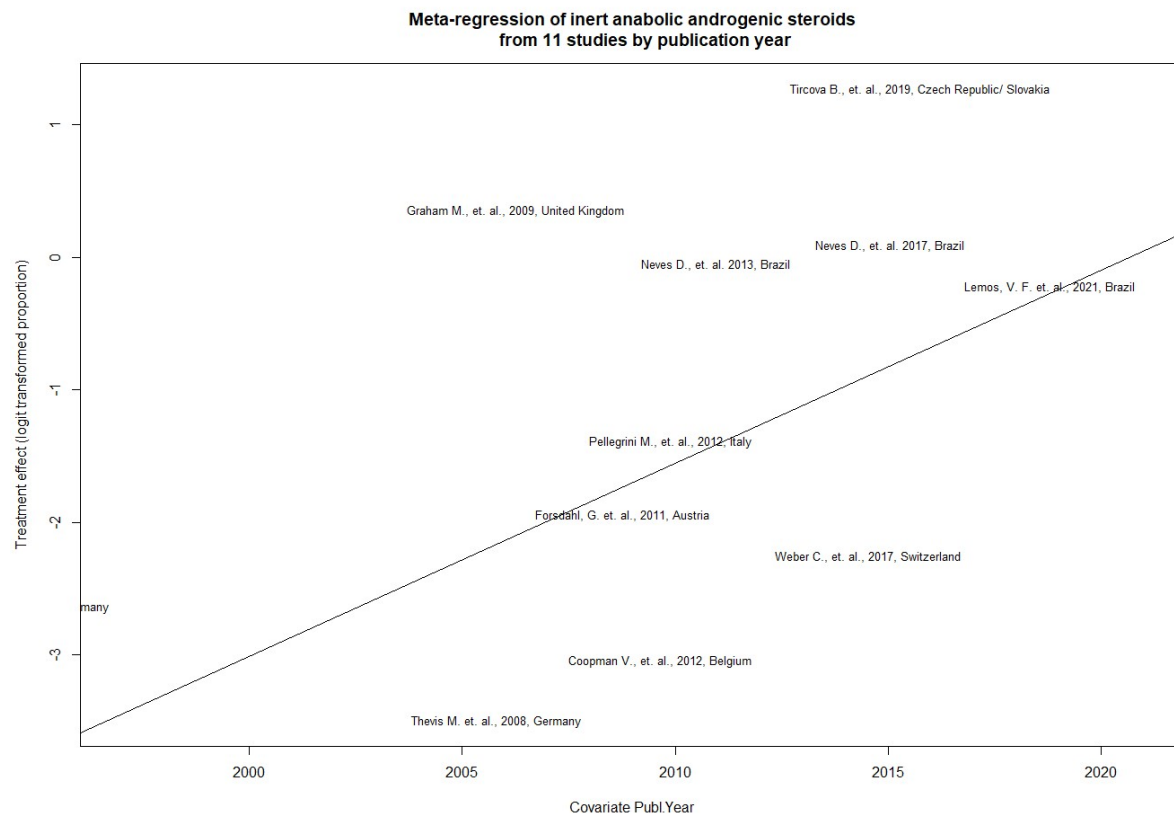

### Mixed-Effects Model (k = 11; tau<sup>2</sup> estimator: ML)

tau<sup>2</sup> (estimated amount of residual heterogeneity): 1.5954  
tau (square root of estimated tau<sup>2</sup> value): 1.2631  
I<sup>2</sup> (residual heterogeneity / unaccounted variability): 95.1459%  
H<sup>2</sup> (unaccounted variability / sampling variability): 20.6013

#### Tests for Residual Heterogeneity:

Wld(df = 9) = 230.6491, p-val < .0001  
LRT(df = 9) = 364.3765, p-val < .0001

#### Test of Moderators (coefficient 2):

F(df1 = 1, df2 = 9) = 3.6433, p-val = 0.0886

#### Model Results:

|           | estimate  | se       | tval    | df | pval   | ci.lb     | ci.ub   |
|-----------|-----------|----------|---------|----|--------|-----------|---------|
| intrcpt   | -294.2141 | 153.5846 | -1.9156 | 9  | 0.0877 | -641.6467 | 53.2185 |
| Publ.Year | 0.1456    | 0.0763   | 1.9088  | 9  | 0.0886 | -0.0270   | 0.3182  |

---

Signif. codes: 0 '\*\*\*' 0.001 '\*\*' 0.01 '\*' 0.05 '.' 0.1 ' ' 1

## S 1.2. PROPORTIONS OF SUBSTITUTED AAS-SAMPLES

### SUMMARY

**SUBSTITUTED AAS-SAMPLES (Other ingredients then declared):**

**44% (CI-95: 0.27 TO 0.63) OVERALL; WITH HIGH HETEROGENEITY (92%); SIGNIFICANTLY HIGHER ( $p = 0.05$ ) IN EUROPE (51%) THAN IN BRAZIL (28%).**

**Meta-regression by publication year showed a decreasing trend of substituted AAS-samples over time ( $p < 0.05$ )**

**(could be due to Musshoff, 1997 was an outlier)**

**Review: Substituted**

Proportions of substituted AAS-Samples from 11 studies,  
grouped by geographical region

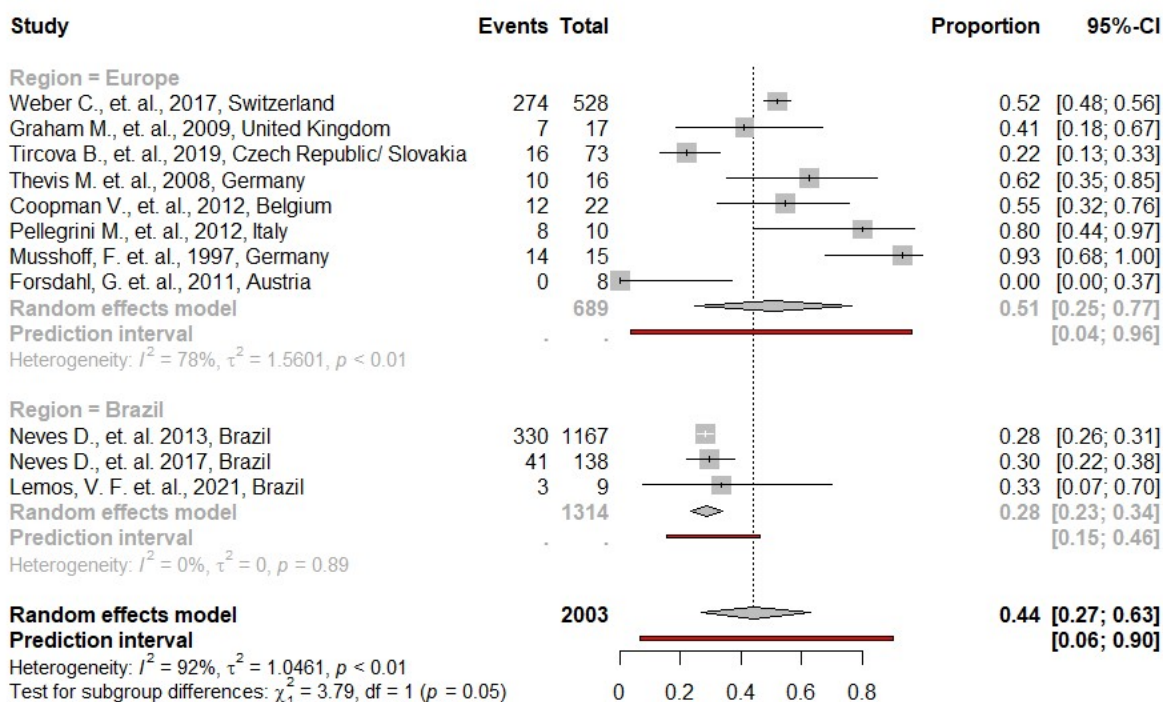

**Number of studies combined: k = 11**

**Number of observations: o = 2003**

**Number of events: e = 715**

| proportion           | 95%-CI                  |
|----------------------|-------------------------|
| Random effects model | 0.4419 [0.2692; 0.6300] |
| Prediction interval  | [0.0645; 0.9009]        |

**Quantifying heterogeneity:**

$\tau^2 = 1.0461$ ;  $\tau = 1.0228$ ;  $I^2 = 91.5\%$  [86.8%; 94.5%];  $H = 3.43$  [2.75; 4.28]

**Test of heterogeneity:**

Q d.f. p-value Test

117.75 10 < 0.0001 Wald-type  
141.26 10 < 0.0001 Likelihood-Ratio

#### Results for subgroups (random effects model):

|                 | k | proportion | 95%-CI tau <sup>2</sup> | tau    | Q      | I <sup>2</sup> |
|-----------------|---|------------|-------------------------|--------|--------|----------------|
| Region = Europe | 8 | 0.5083     | [0.2465; 0.7656]        | 1.5601 | 1.2490 | 32.18 78.2%    |
| Region = Brazil | 3 | 0.2846     | [0.2342; 0.3411]        | 0      | 0      | 0.23 0.0%      |

#### Test for subgroup differences (random effects model):

Q d.f. p-value  
Between groups 3.79 1 0.0516

#### Prediction intervals for subgroups:

95%-PI  
Region = Europe [0.0374; 0.9649]  
Region = Brazil [0.1547; 0.4639]

#### Details on meta-analytical method:

- Random intercept logistic regression model
- Maximum-likelihood estimator for tau<sup>2</sup>
- Hartung-Knapp adjustment for random effects model
- Logit transformation
- Clopper-Pearson confidence interval for individual studies
- Continuity correction of 0.5 in studies with zero cell frequencies  
(only used to calculate individual study results)

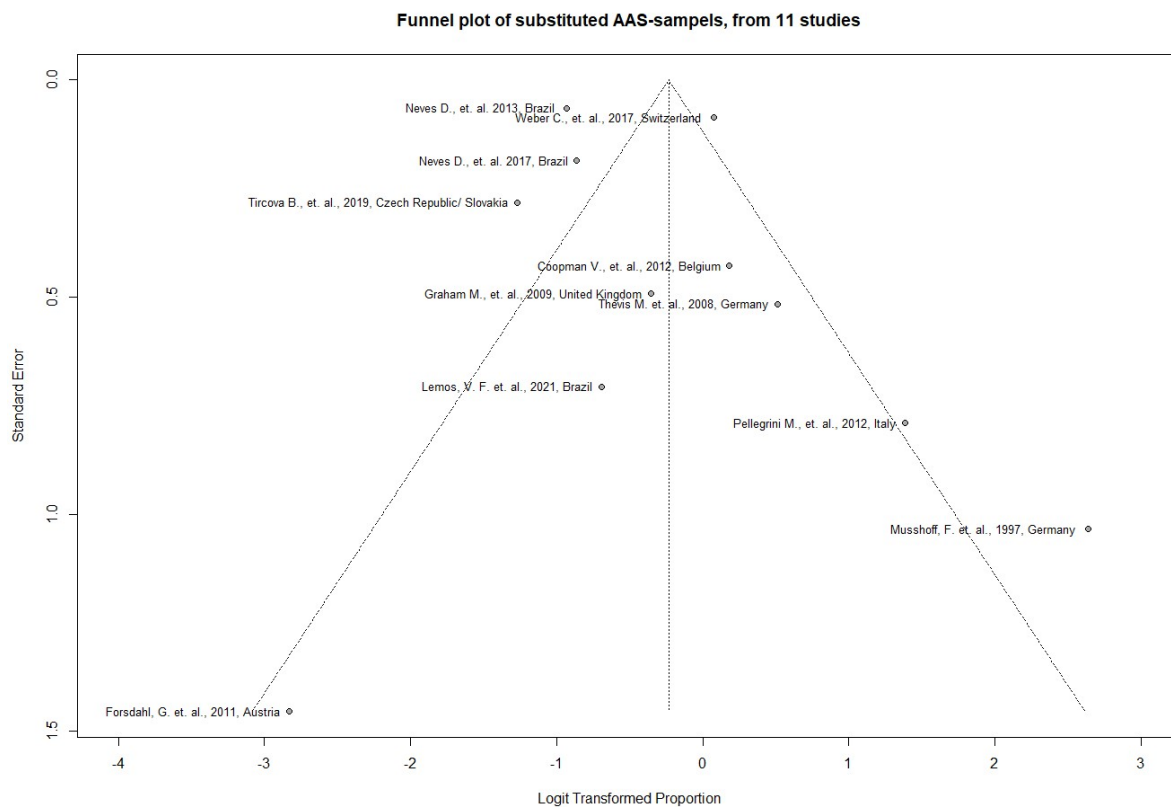

Review: Substituted

#### Linear regression test of funnel plot asymmetry

**Test result:  $t = 0.86$ ,  $df = 9$ ,  $p\text{-value} = 0.4109$**

**Sample estimates:**

bias se.bias intercept se.intercept  
11.1779 12.9628 -0.6281 0.1875

**Details:**

- multiplicative residual heterogeneity variance ( $\tau^2 = 30.5153$ )
- predictor: inverse of total sample size
- weight: inverse variance of average event probability
- reference: Peters et al. (2006), JAMA

**Meta-Regression by publication year**

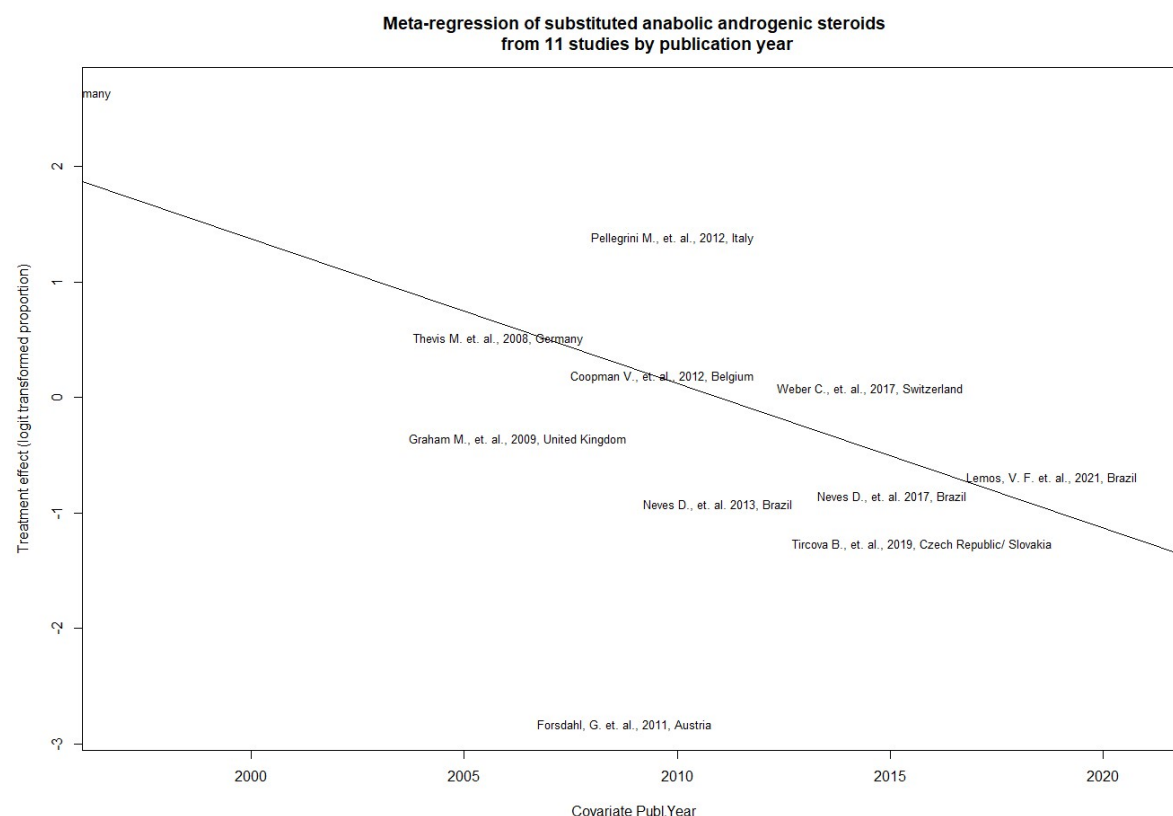

**Mixed-Effects Model ( $k = 11$ ;  $\tau^2$  estimator: ML)**

$\tau^2$  (estimated amount of residual heterogeneity): 0.3928

$\tau$  (square root of estimated  $\tau^2$  value): 0.6268

$I^2$  (residual heterogeneity / unaccounted variability): 87.0071%

$H^2$  (unaccounted variability / sampling variability): 7.6965

**Tests for Residual Heterogeneity:**

Wld( $df = 9$ ) = 105.0720,  $p\text{-val} < .0001$

LRT( $df = 9$ ) = 139.3046,  $p\text{-val} < .0001$

**Test of Moderators (coefficient 2):**

$F(df1 = 1, df2 = 9) = 8.1312$ ,  $p\text{-val} = 0.0190$

**Model Results:**

|           | estimate | se      | tval    | df | pval   | ci.lb   | ci.ub      |
|-----------|----------|---------|---------|----|--------|---------|------------|
| intrcpt   | 251.5863 | 88.3322 | 2.8482  | 9  | 0.0191 | 51.7649 | 451.4076 * |
| Publ.Year | -0.1251  | 0.0439  | -2.8515 | 9  | 0.0190 | -0.2244 | -0.0259 *  |

Signif. codes: 0 '\*\*\*' 0.001 '\*\*' 0.01 '\*' 0.05 '.' 0.1 ' ' 1

### S 1.3. PROPORTION OF ADULTERATED AAS-SAMPLES

#### SUMMARY

**ADULTERATED AAS-SAMPLES (= more ingredients then declared):**

**11% (CI-95: 0.02 TO 0.42) OVERALL; WITH HIGH HETEROGENEITY (92%); NO SIGNIFICANT DIFFERENCE ( $p = 0.47$ ) BETWEEN EUROPE (13%) AND BRAZIL (5%).**

**Meta-regression by publication year showed no significant effect.**

#### Proportions of adulterated AAS-sampels from 10 studies

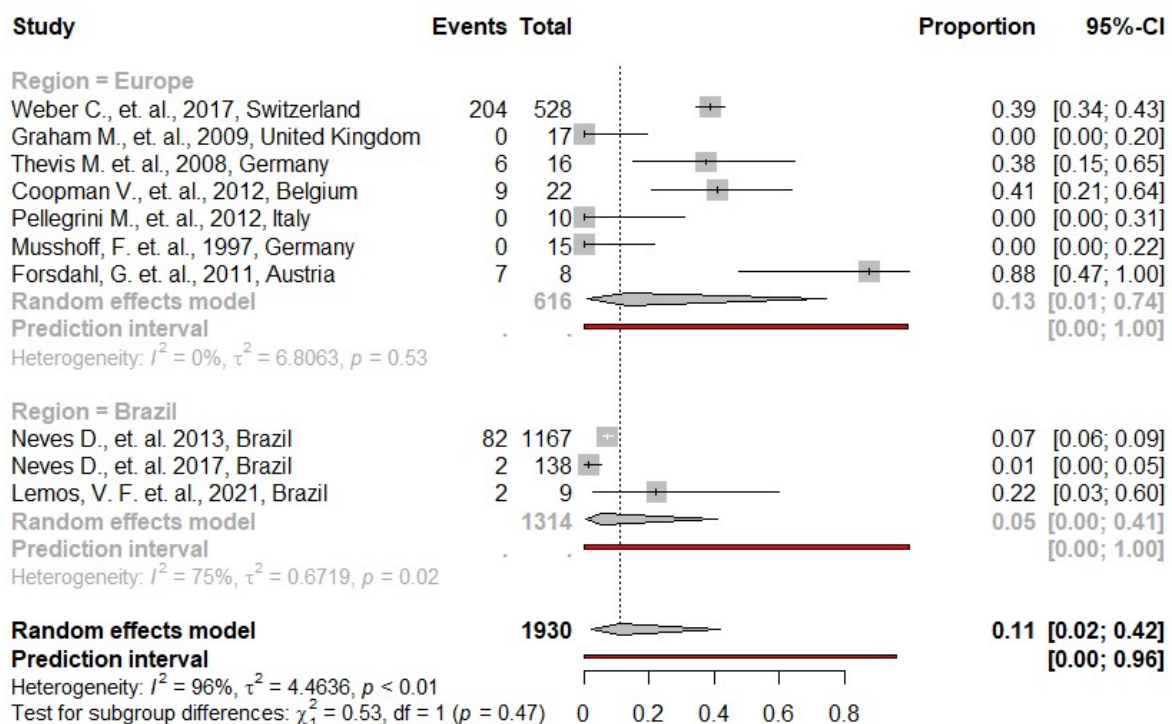

**Number of studies combined: k = 10**

**Number of observations: o = 1930**

**Number of events: e = 312**

| proportion           | 95%-CI                  |
|----------------------|-------------------------|
| Random effects model | 0.1125 [0.0221; 0.4162] |
| Prediction interval  | [0.0007; 0.9575]        |

#### Quantifying heterogeneity:

$\tau^2 = 4.4636$ ;  $\tau = 2.1127$ ;  $I^2 = 96.3\%$  [94.7%; 97.4%];  $H = 5.22$  [4.36; 6.25]

#### Test of heterogeneity:

| Q d.f. | p-value      | Test             |
|--------|--------------|------------------|
| 245.49 | $9 < 0.0001$ | Wald-type        |
| 322.24 | $9 < 0.0001$ | Likelihood-Ratio |

#### Results for subgroups (random effects model):

| k | proportion | 95%-CI | $\tau^2$ | $\tau$ | Q | $I^2$ |
|---|------------|--------|----------|--------|---|-------|
|---|------------|--------|----------|--------|---|-------|

Region = Europe 7 0.1315 [0.0079; 0.7419] 6.8063 2.6089 5.09 0.0%  
 Region = Brazil 3 0.0540 [0.0047; 0.4090] 0.6719 0.8197 8.02 75.0%

### Test for subgroup differences (random effects model):

Q d.f. p-value  
 Between groups 0.53 1 0.4653

### Prediction intervals for subgroups:

95%-PI  
 Region = Europe [0.0001; 0.9959]  
 Region = Brazil [0.0000; 0.9999]

### Details on meta-analytical method:

- Random intercept logistic regression model
- Maximum-likelihood estimator for  $\tau^2$
- Hartung-Knapp adjustment for random effects model
- Logit transformation
- Clopper-Pearson confidence interval for individual studies
- Continuity correction of 0.5 in studies with zero cell frequencies  
 (only used to calculate individual study results)

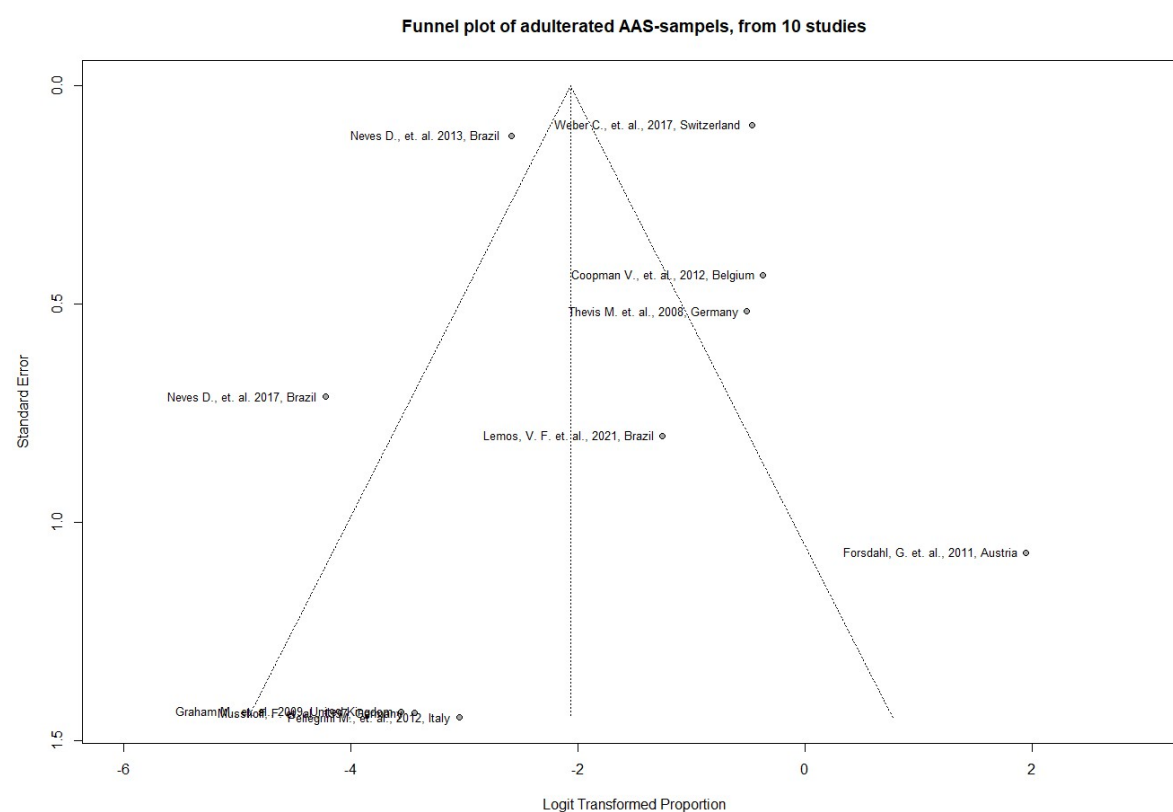

Review: Adulterated

### Linear regression test of funnel plot asymmetry

Test result:  $t = 0.50$ ,  $df = 8$ ,  $p\text{-value} = 0.6335$

### Sample estimates:

|  | bias    | se.bias | intercept | se.intercept |
|--|---------|---------|-----------|--------------|
|  | 14.6240 | 29.5095 | -1.3168   | 0.4895       |

### Details:

- multiplicative residual heterogeneity variance ( $\tau^2 = 46.8001$ )
- predictor: inverse of total sample size
- weight: inverse variance of average event probability
- reference: Peters et al. (2006), JAMA

## Meta-regression by publication year

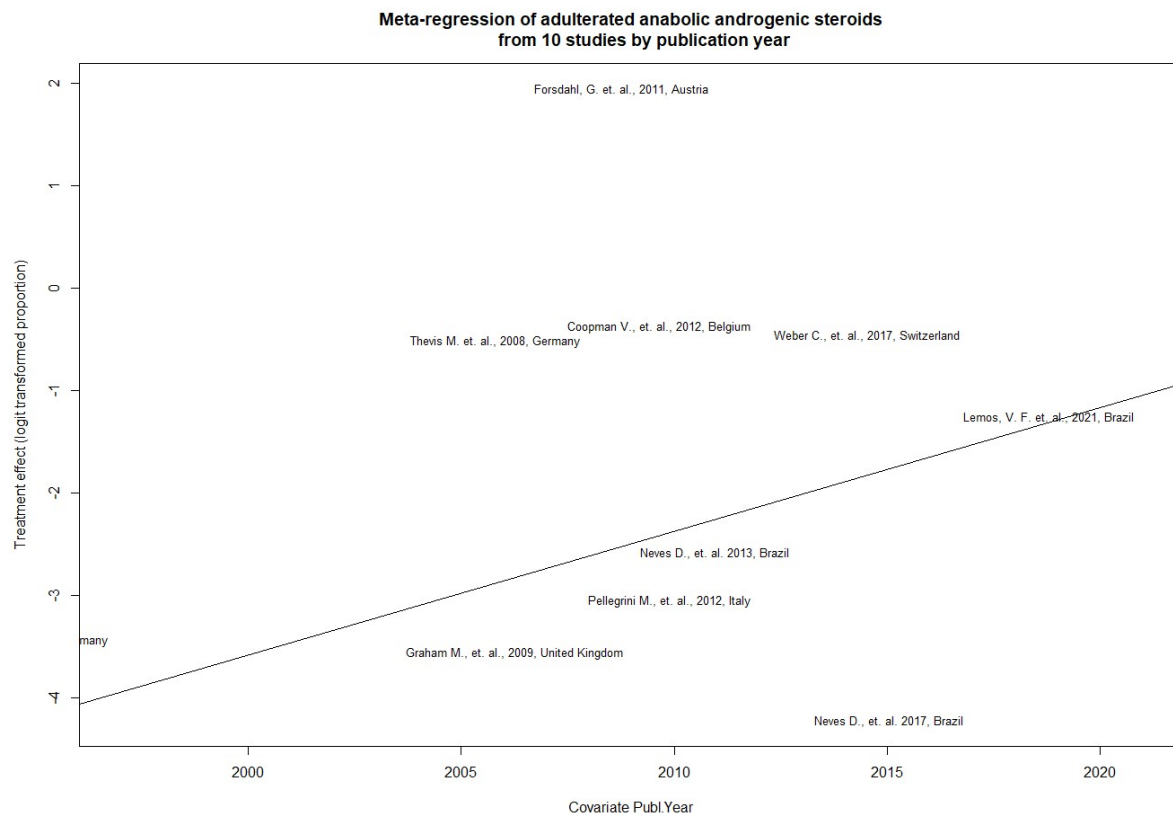

## Mixed-Effects Model (k = 10; tau<sup>2</sup> estimator: ML)

tau<sup>2</sup> (estimated amount of residual heterogeneity): 4.5401  
tau (square root of estimated tau<sup>2</sup> value): 2.1307  
I<sup>2</sup> (residual heterogeneity / unaccounted variability): 96.9090%  
H<sup>2</sup> (unaccounted variability / sampling variability): 32.3515

### Tests for Residual Heterogeneity:

Wld(df = 8) = 137.7571, p-val < .0001  
LRT(df = 8) = 199.2876, p-val < .0001

### Test of Moderators (coefficient 2):

F(df1 = 1, df2 = 8) = 0.6845, p-val = 0.4320

### Model Results:

|           | estimate  | se       | tval    | df | pval   | ci.lb     | ci.ub    |
|-----------|-----------|----------|---------|----|--------|-----------|----------|
| intrcpt   | -244.8259 | 293.4994 | -0.8342 | 8  | 0.4284 | -921.6368 | 431.9850 |
| Publ.Year | 0.1206    | 0.1458   | 0.8273  | 8  | 0.4320 | -0.2156   | 0.4568   |

## S2.1 PROPORTION OF OVER-CONCENTRATED AAS-SAMPLES

### SUMMARY

**Over-concentrated AAS-SAMPLES (= higher concentration than anticipated):**  
**33% (CI-95: 0.06 TO 0.81) OVERALL; WITH HIGH HETEROGENEITY (96%); SIGNIFICANTLY LOWER**  
**( $p < 0.01$ ) IN EUROPE (12%) THAN IN BRAZIL (64%).**  
**Meta-regression by publication year showed no significant effect.**

### Proportions of over-concentrated AAS-sampels from 4 studies

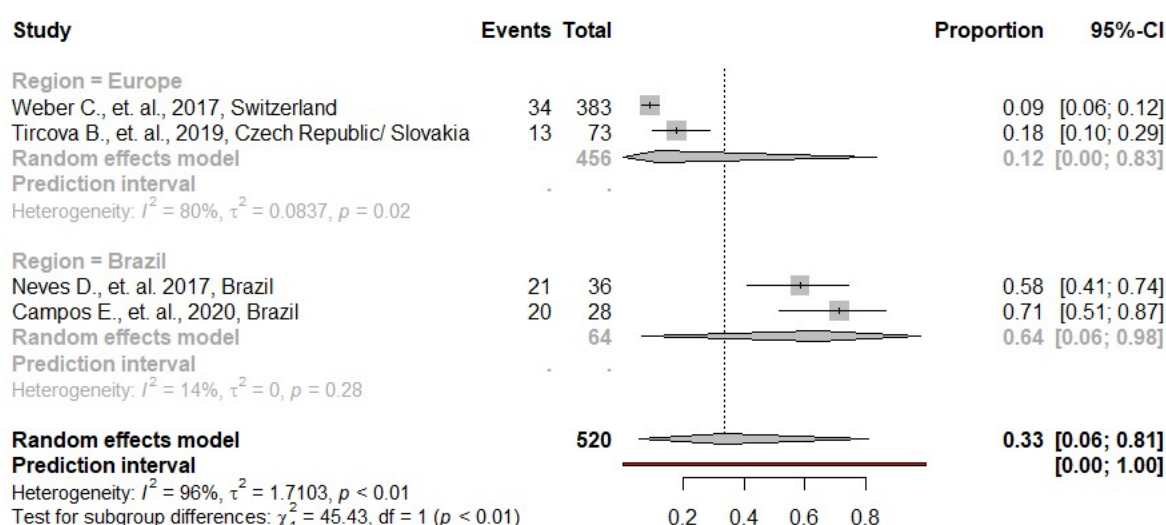

**Number of studies combined: k = 4**

**Number of observations: o = 520**

**Number of events: e = 88**

|                      | proportion | 95%-CI           |
|----------------------|------------|------------------|
| Random effects model | 0.3348     | [0.0557; 0.8111] |
| Prediction interval  |            | [0.0009; 0.9965] |

### Quantifying heterogeneity:

$\tau^2 = 1.7103$ ;  $\tau = 1.3078$ ;  $I^2 = 96.4\%$  [93.4%; 98.1%];  $H = 5.29$  [3.90; 7.17]

### Test of heterogeneity:

| Q     | d.f. | p-value  | Test             |
|-------|------|----------|------------------|
| 83.89 | 3    | < 0.0001 | Wald-type        |
| 92.49 | 3    | < 0.0001 | Likelihood-Ratio |

### Results for subgroups (random effects model):

|                 | k | proportion | 95%-CI           | $\tau^2$ | $\tau$ | Q    | $I^2$ |
|-----------------|---|------------|------------------|----------|--------|------|-------|
| Region = Europe | 2 | 0.1155     | [0.0034; 0.8339] | 0.0837   | 0.2893 | 5.08 | 80.3% |
| Region = Brazil | 2 | 0.6406     | [0.0611; 0.9799] | 0        | 0      | 1.16 | 14.0% |

### Test for subgroup differences (random effects model):

|                | Q     | d.f. | p-value  |
|----------------|-------|------|----------|
| Between groups | 45.43 | 1    | < 0.0001 |

**Details on meta-analytical method:**

- Random intercept logistic regression model
  - Maximum-likelihood estimator for  $\tau^2$
  - Hartung-Knapp adjustment for random effects model
  - Logit transformation
  - Clopper-Pearson confidence interval for individual studies
- 

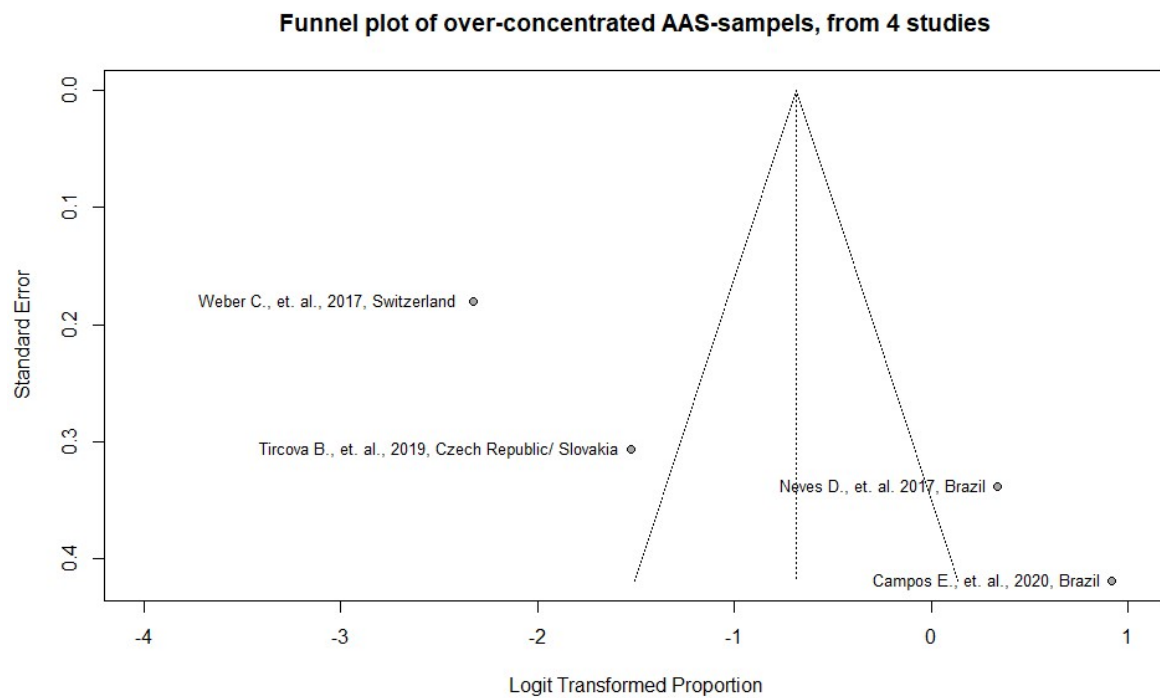**Linear regression test of funnel plot asymmetry**

Number of studies ( $k=4$ ) too small to test for small study effects

## Meta-Regression by publication year

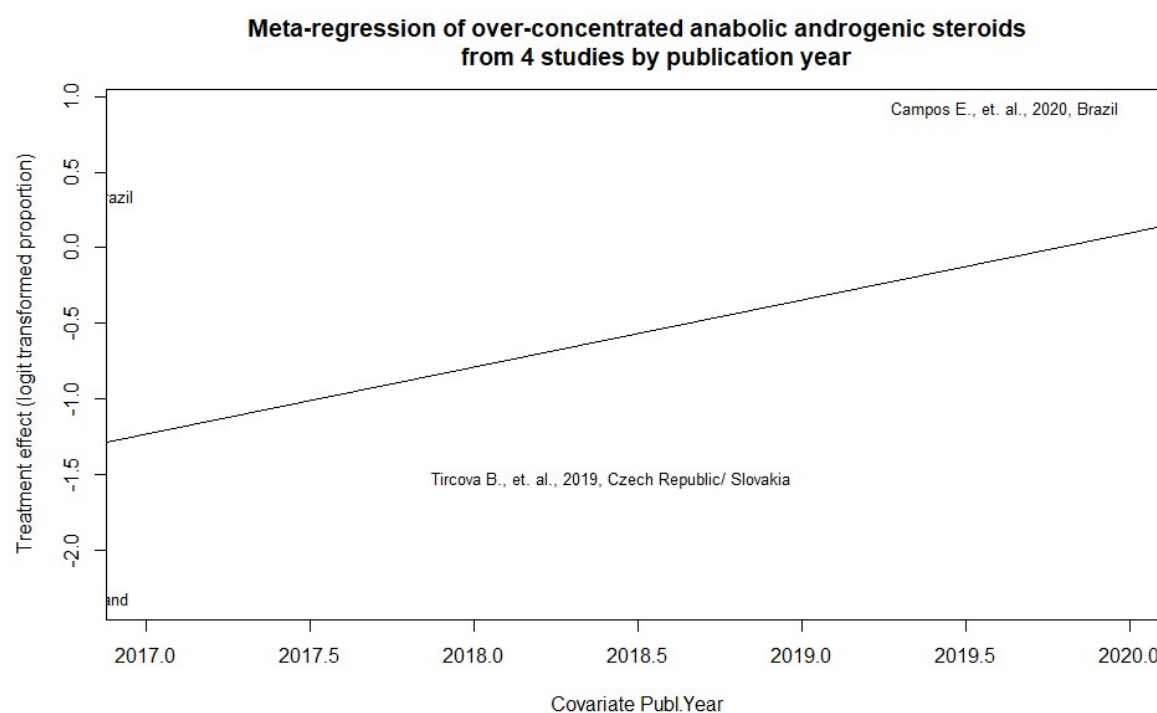

## Mixed-Effects Model (k = 4; tau<sup>2</sup> estimator: ML)

tau<sup>2</sup> (estimated amount of residual heterogeneity): 1.3825  
tau (square root of estimated tau<sup>2</sup> value): 1.1758  
I<sup>2</sup> (residual heterogeneity / unaccounted variability): 93.9229%  
H<sup>2</sup> (unaccounted variability / sampling variability): 16.4552

## Tests for Residual Heterogeneity:

Wld(df = 2) = 62.4323, p-val < .0001  
LRT(df = 2) = 62.3534, p-val < .0001

## Test of Moderators (coefficient 2):

F(df1 = 1, df2 = 2) = 0.8862, p-val = 0.4459

## Model Results:

|           | estimate  | se       | tval    | df | pval   | ci.lb      | ci.ub     |
|-----------|-----------|----------|---------|----|--------|------------|-----------|
| intrcpt   | -897.0918 | 952.2405 | -0.9421 | 2  | 0.4456 | -4994.2520 | 3200.0684 |
| Publ.Year | 0.4442    | 0.4718   | 0.9414  | 2  | 0.4459 | -1.5859    | 2.4742    |

---

Signif. codes: 0 '\*\*\*' 0.001 '\*\*' 0.01 '\*' 0.05 '.' 0.1 ' ' 1

## S2.2 PROPORTION OF UNDER-CONCENTRATED AAS-SAMPLES

### SUMMARY (S2.2 is the inverse of S2.1)

#### Proportions of under-concentrated AAS-sampels from 4 studies

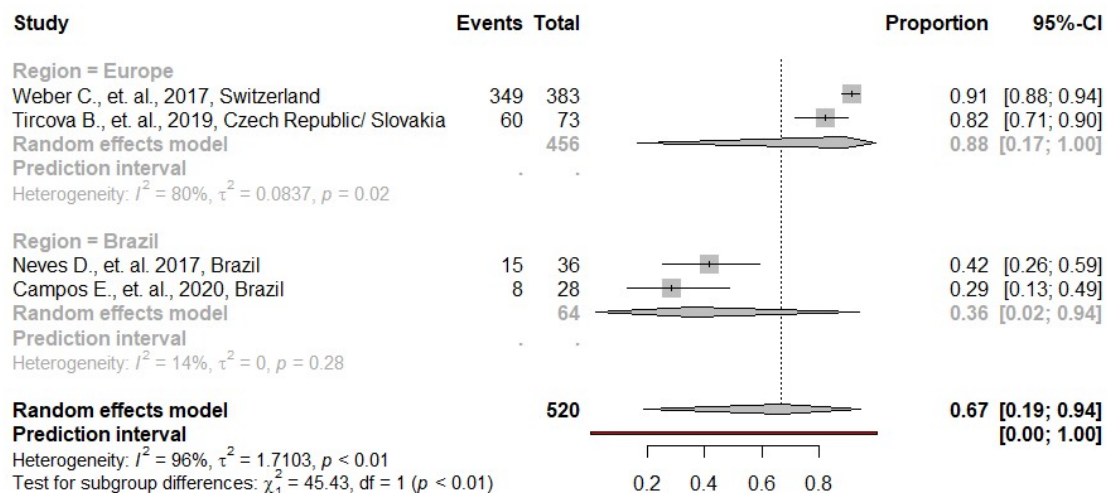

Number of studies combined:  $k = 4$

Number of observations:  $o = 520$

Number of events:  $e = 432$

|                      | proportion | 95%-CI           |
|----------------------|------------|------------------|
| Random effects model | 0.6652     | [0.1889; 0.9443] |
| Prediction interval  |            | [0.0035; 0.9991] |

#### Quantifying heterogeneity:

$\tau^2 = 1.7103$ ;  $\tau = 1.3078$ ;  $I^2 = 96.4\%$  [93.4%; 98.1%];  $H = 5.29$  [3.90; 7.17]

#### Test of heterogeneity:

| Q d.f. | p-value    | Test             |
|--------|------------|------------------|
| 83.89  | 3 < 0.0001 | Wald-type        |
| 92.49  | 3 < 0.0001 | Likelihood-Ratio |

#### Results for subgroups (random effects model):

|                 | k | proportion | 95%-CI           | $\tau^2$ | $\tau$ | Q    | $I^2$ |
|-----------------|---|------------|------------------|----------|--------|------|-------|
| Region = Europe | 2 | 0.8845     | [0.1661; 0.9966] | 0.0837   | 0.2893 | 5.08 | 80.3% |
| Region = Brazil | 2 | 0.3594     | [0.0201; 0.9389] | 0        | 0      | 1.16 | 14.0% |

#### Test for subgroup differences (random effects model):

|                | Q d.f. | p-value    |
|----------------|--------|------------|
| Between groups | 45.43  | 1 < 0.0001 |

#### Details on meta-analytical method:

- Random intercept logistic regression model

- Maximum-likelihood estimator for  $\tau^2$
  - Hartung-Knapp adjustment for random effects model
  - Logit transformation
  - Clopper-Pearson confidence interval for individual studies
- 

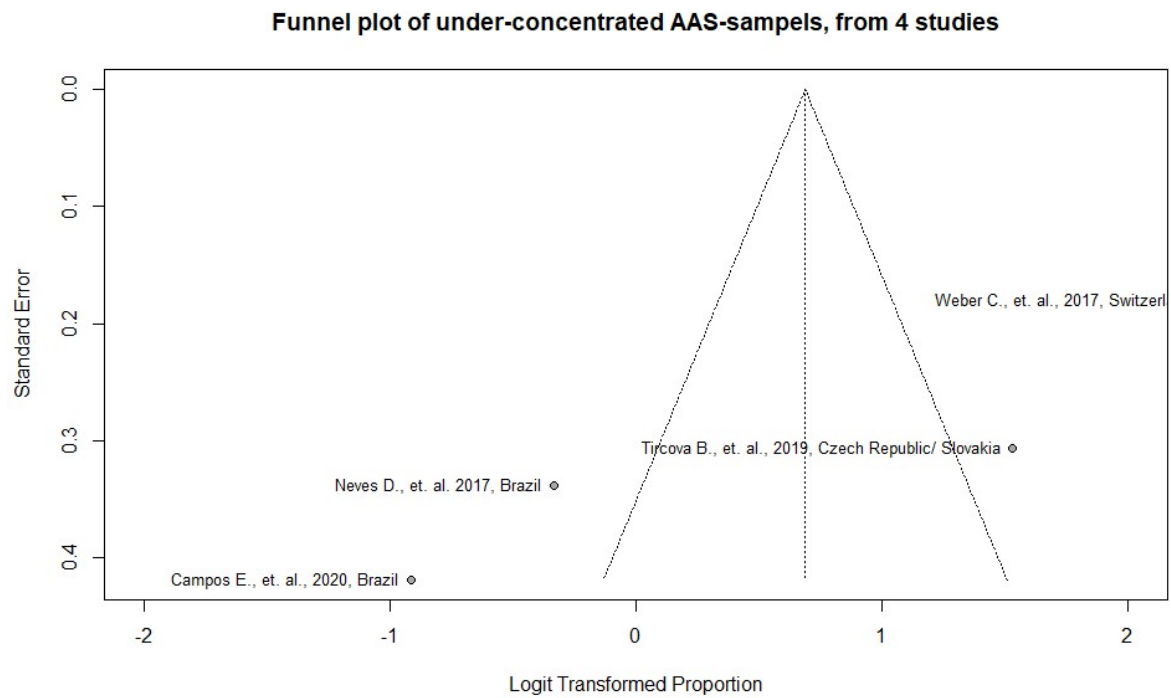

#### Linear regression test of funnel plot asymmetry

Number of studies ( $k=4$ ) too small to test for small study effects

## Meta-regression by publication year

### Meta-regression of under-concentrated anabolic androgenic steroids from 4 studies by publication year

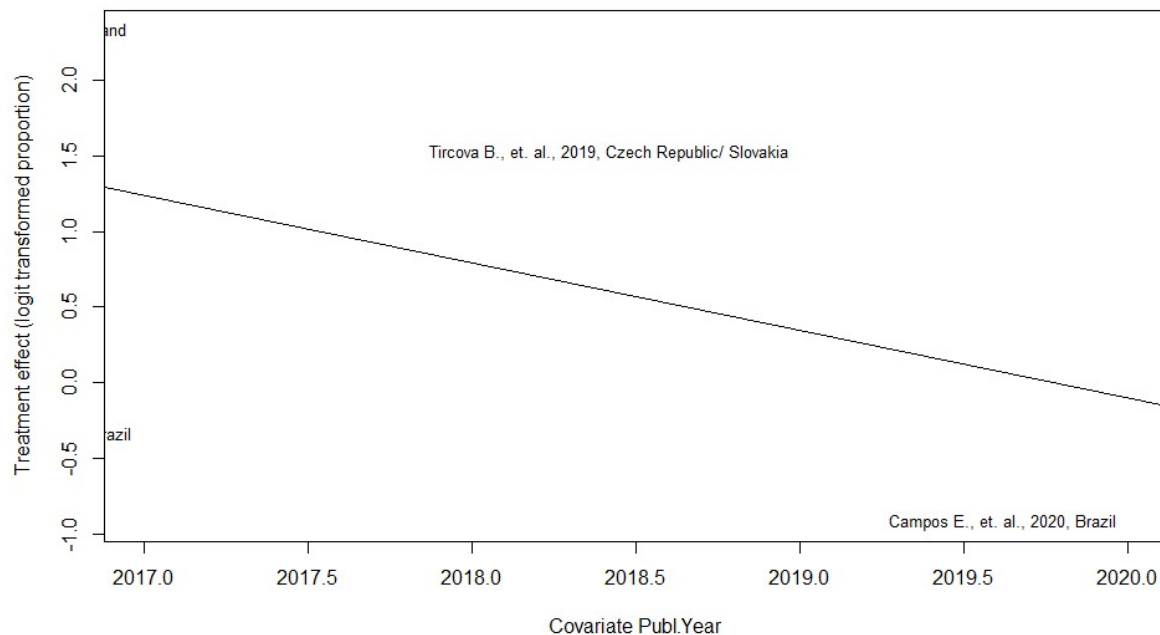

## Mixed-Effects Model (k = 4; tau<sup>2</sup> estimator: ML)

tau<sup>2</sup> (estimated amount of residual heterogeneity): 1.3825  
tau (square root of estimated tau<sup>2</sup> value): 1.1758  
I<sup>2</sup> (residual heterogeneity / unaccounted variability): 93.9229%  
H<sup>2</sup> (unaccounted variability / sampling variability): 16.4552

### Tests for Residual Heterogeneity:

Wld(df = 2) = 62.4323, p-val < .0001

LRT(df = 2) = 62.3534, p-val < .0001

### Test of Moderators (coefficient 2):

F(df1 = 1, df2 = 2) = 0.8862, p-val = 0.4459

### Model Results:

|           | estimate | se       | tval    | df | pval   | ci.lb      | ci.ub     |
|-----------|----------|----------|---------|----|--------|------------|-----------|
| intrcpt   | 897.1058 | 952.2406 | 0.9421  | 2  | 0.4456 | -3200.0548 | 4994.2663 |
| Publ.Year | -0.4442  | 0.4718   | -0.9414 | 2  | 0.4459 | -2.4742    | 1.5859    |

---

Signif. codes: 0 '\*\*\*' 0.001 '\*\*' 0.01 '\*' 0.05 '.' 0.1 ' ' 1
